# Supplementary material
Source: Royal Society of Chemistry journal article supplement (doi:10.1039/d6cy00126b)
Supplement: d6cy00126b1.pdf [file d6cy00126b1.pdf]

## **Oxidative degradation of endocrine disruptor Bisphenol-A on MnO<sub>2</sub> nanosheets under ambient condition**

Subhadeep Biswas<sup>a, b, 1</sup>, Vishnu Raj R<sup>a, 1</sup>, Sandip Saha<sup>c, d</sup>, Ramkrishna Sahoo<sup>c, e</sup>, Anjali Pal<sup>a\*</sup>

<sup>a</sup> *Department of Civil Engineering, Indian Institute of Technology Kharagpur, West Bengal, India - 721302*

<sup>b</sup> *Department of Civil Engineering, National Institute of Technology Silchar, Assam, India - 788010*

<sup>c</sup> *Department of Chemistry, Indian Institute of Technology Kharagpur, West Bengal, India - 721302*

<sup>d</sup> *Department of Chemistry, Nabadwip Vidyasagar College, Nabadwip, West Bengal, India - 741302.*

<sup>e</sup> *Department of Science and Technology, Ministry of Science and Technology, New Delhi, India - 110016*

### **Supplementary Information**

---

\* Author for correspondence. Email: [anjalipal@civil.iitkgp.ac.in](mailto:anjalipal@civil.iitkgp.ac.in); Phone: 91-9474448946

<sup>1</sup> Both authors have contributed equally for the article and can be considered as first author

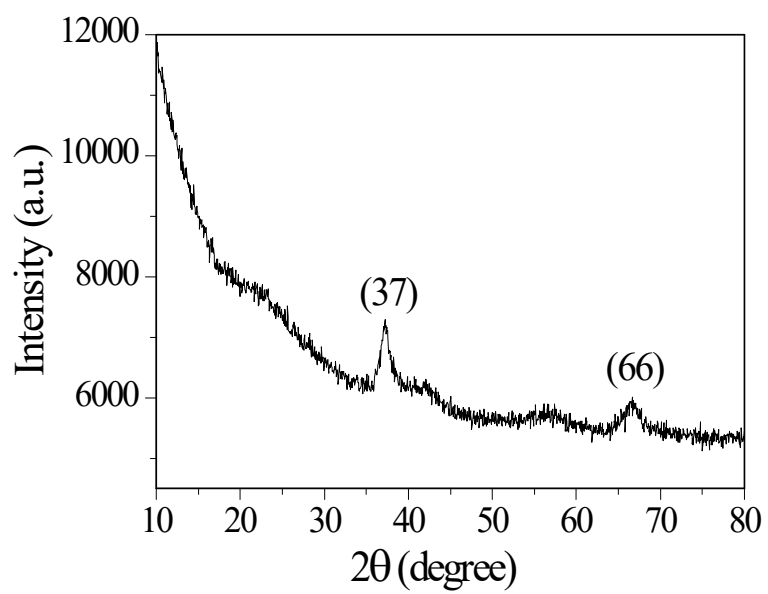

Fig.S1. XRD pattern of the as-prepared nano MnO<sub>2</sub><sup>29</sup>

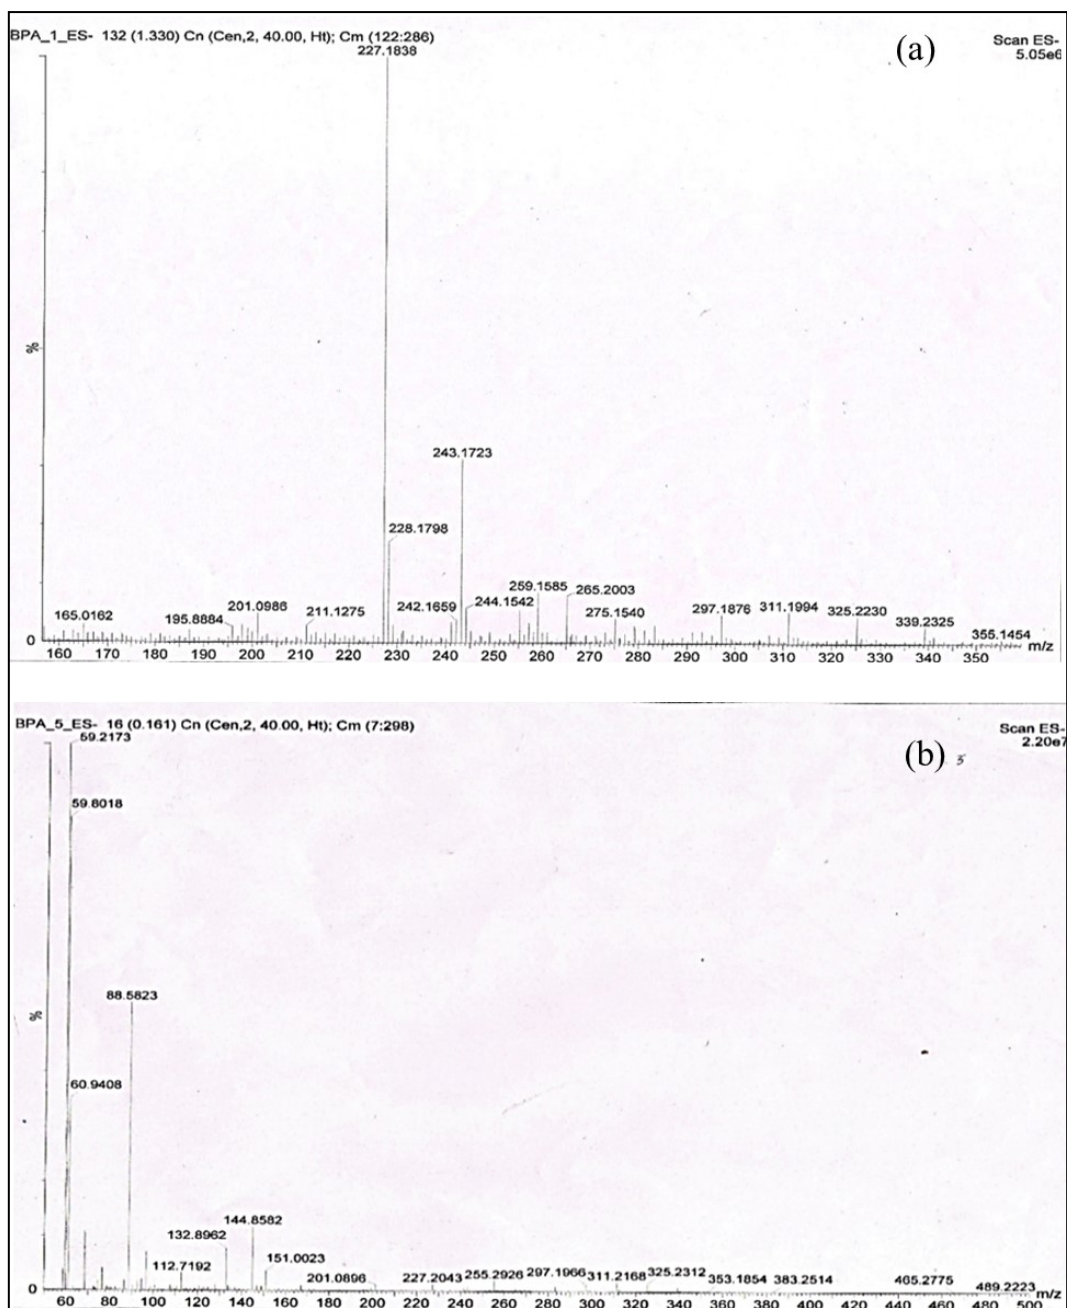

Fig. S2. Mass analysis (a) Mass spectrum of pure BPA solution (b) Mass spectrum of solution after 60 min reaction with  $\text{MnO}_2$  nanosheets.
